# Supplementary material for: Fibroadipogenic progenitors mediate the ability of HDAC inhibitors to promote regeneration in dystrophic muscles of young, but not old Mdx mice
Source: EMBO Mol Med. 2013 Mar 18;5(4):626–39. doi: 10.1002/emmm.201202096 (PMC3628105; doi:10.1002/emmm.201202096)
Supplement: Supplementary file 2 [file emmm0005-0626-sd2.pdf]

## **Supportive Information Table of Contents:**

- Supportive Information Figure 1
- Supportive Information Figure legend 1
- Supportive Information Figure 2
- Supportive Information Figure legend 2
- Supportive Information Figure 3
- Supportive Information Figure legend 3
- Supportive Information Figure 4
- Supportive Information Figure legend 4

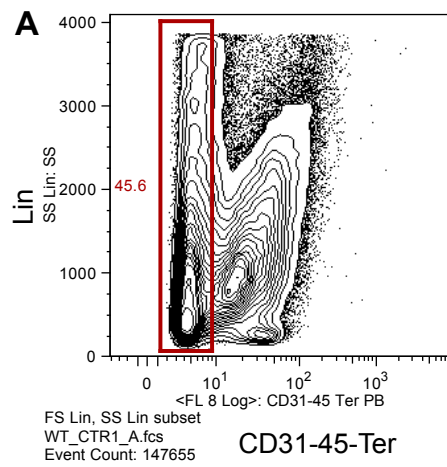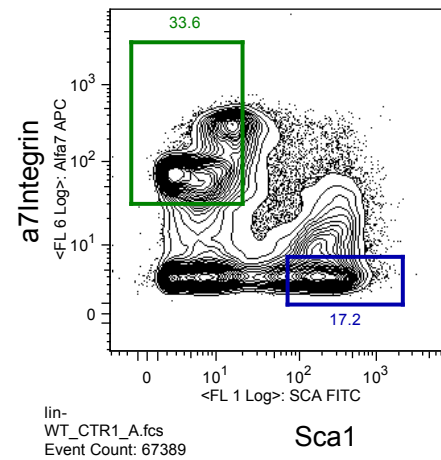

MuSCs  
(a7Integrin+/Sca1-)

Wild Type

FAP  
(a7Integrin-/Sca1+)

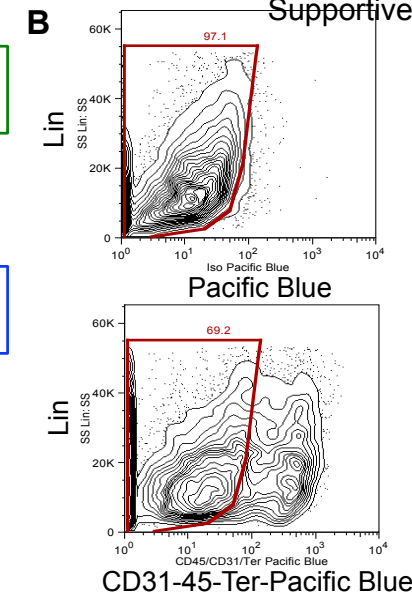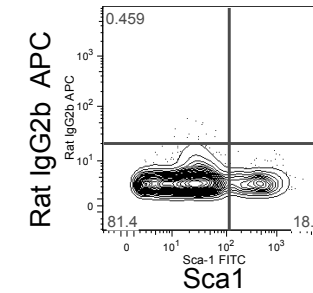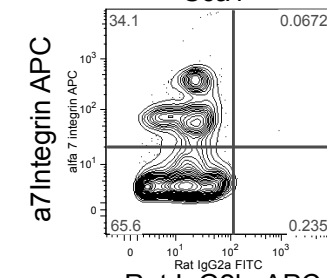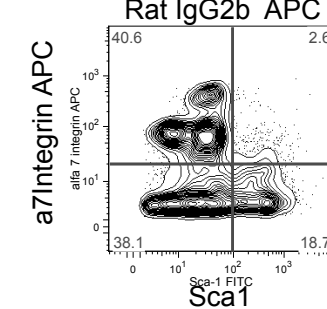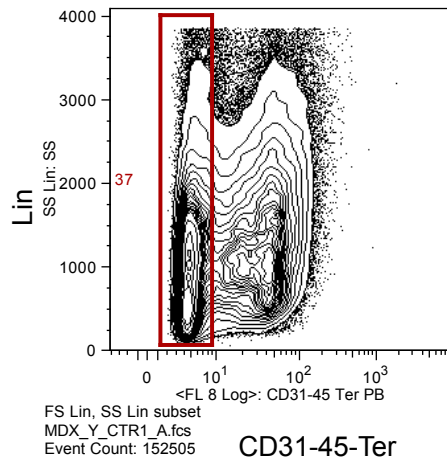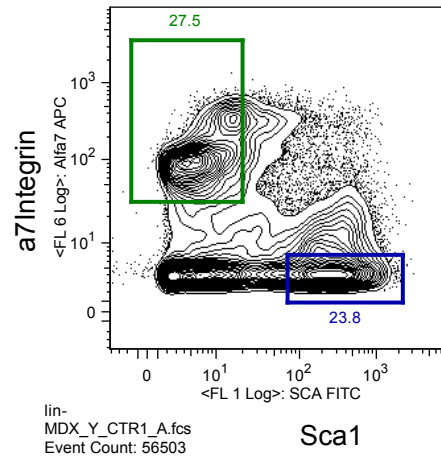

MuSCs  
(a7Integrin+/Sca1-)

mdx YOUNG

FAP  
(a7Integrin-/Sca1+)

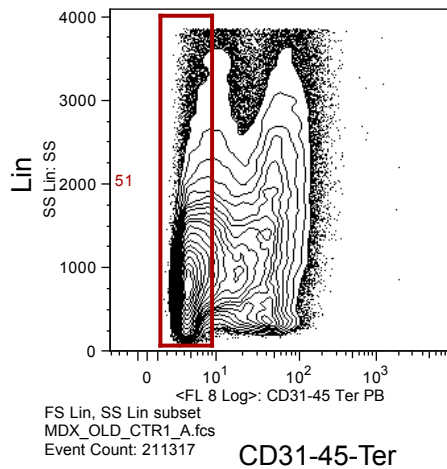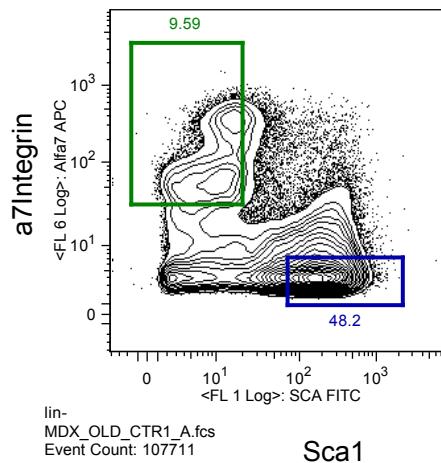

MuSCs  
(a7Integrin+/Sca1-)

mdx OLD

FAP  
(a7Integrin-/Sca1+)

**Supporting information Figure 1 - FACS mediated isolation of MuSCs and FAPs from wild type and mdx mice.**

**(A)** Whole mononucleated cells from hindlimb skeletal muscles of wild type (upper panels) or young (1.5 month old; middle panels) and old (1 year old; bottom panels) mdx mice were selected based on morphological parameters, propidium iodide negativity and subjected to FACS, as indicated in the scheme. CD45<sup>+</sup>/CD31<sup>+</sup>/Ter119<sup>+</sup> cells were negatively selected to exclude macrophages, hematopoietic and endothelial cells. Lineage negative cells (Ter119<sup>-</sup>/CD45<sup>-</sup>/CD31<sup>-</sup> cells; red box) were then separated on the basis of Sca-1 and  $\alpha$ 7-integrin relative expression. Muscle satellite cells (MuSCs) were isolated as  $\alpha$ 7-integrin<sup>+</sup>/Sca-1<sup>-</sup> cells (green box). Fibro-adipogenic progenitors (FAPs) were isolated as  $\alpha$ 7-integrin<sup>-</sup>/Sca-1<sup>+</sup> cells (blue box). **(B)** FACS plots showing the fluorescence minus one (FMO) controls of antibodies used in (A).

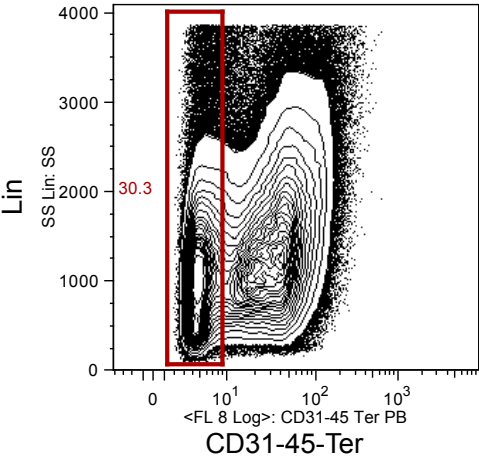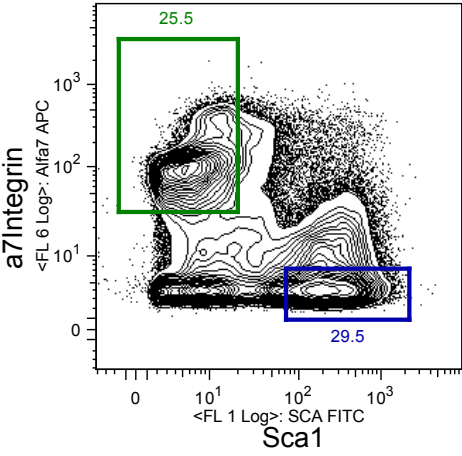

MuScs  
(a7Integrin+/Sca1-)

**Mdx young TSA**

FAP  
(a7Integrin-/Sca1+)

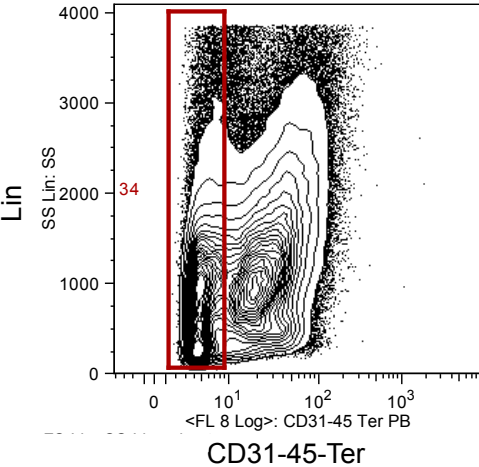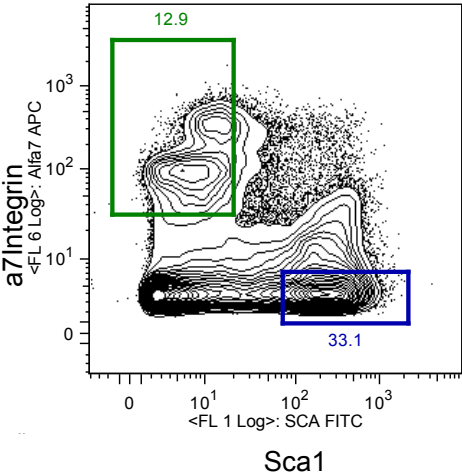

MuScs  
(a7Integrin+/Sca1-)

**Mdx old TSA**

FAP  
(a7Integrin-/Sca1+)

**Supporting information Figure 2 - FACS mediated isolation of MuSCs and FAPs from TSA-treated mdx mice.**

**(A)** Whole mononucleated cells from hindlimb skeletal muscles of young (1.5 month old; top panels) and old (1 year old; bottom panels) mdx mice treated with TSA were selected based on morphological parameters, propidium iodide negativity and subjected to FACS, as indicated in the scheme. CD45<sup>+</sup>/CD31<sup>+</sup>/Ter119<sup>+</sup> cells were negatively selected to exclude macrophages, hematopoietic and endothelial cells. Lineage negative cells (Ter119<sup>-</sup>/CD45<sup>-</sup>/CD31<sup>-</sup> cells; red box) were then separated on the basis of Sca-1 and  $\alpha$ 7-integrin relative expression. Muscle satellite cells (MuSCs) were isolated as  $\alpha$ 7-integrin<sup>+</sup>/Sca-1<sup>-</sup> cells (green box). Fibro-adipogenic progenitors (FAPs) were isolated as  $\alpha$ 7-integrin<sup>-</sup>/Sca-1<sup>+</sup> cells (blue box).

Supportive information Figure 3

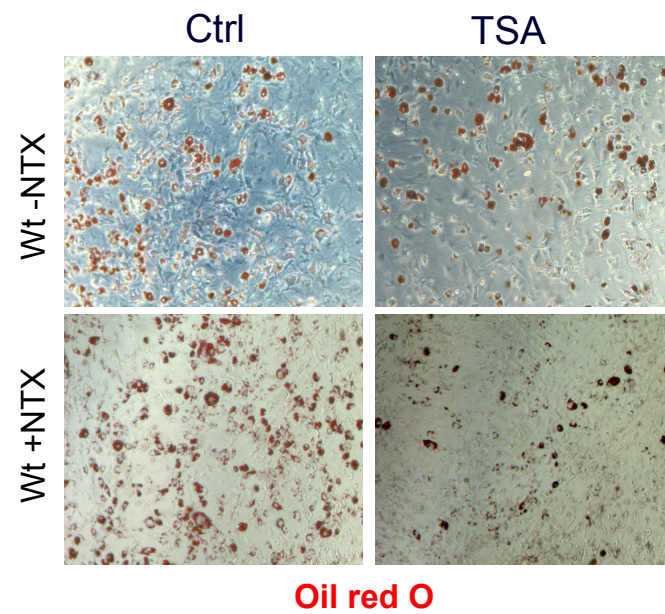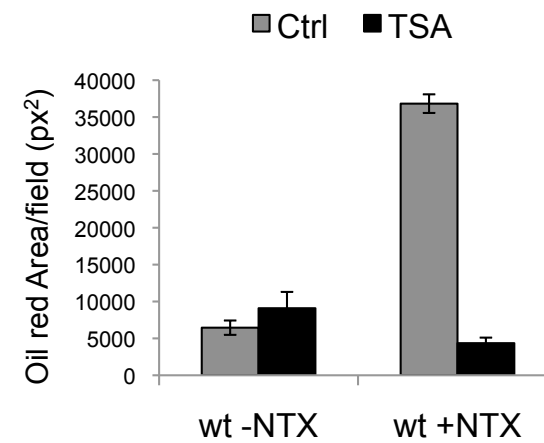

**Supportive information Figure 3 - HDACi repress the adipogenic potential of FAPs cells isolated from wild-type injured muscles.**

Left Panel: Right hindlimb skeletal muscles of wild type mice were injured with notexin (NTX) and contro-laterals were left uninjured. After 10 days of treatment with vehicle (Ctrl) or TSA, FAPs where isolated by FACS and cultured in proliferating medium for 7 days, induced to differentiate in adipogenic differentiation medium (AdpDM) for 6 days and then stained by Oil Red O to assess adipogenic differentiation. Right Panel: Graph showing the quantification of Oil Red O areas (pixel<sup>2</sup>) per field in the same conditions as in (A). Data are represented as average  $\pm$  SEM.

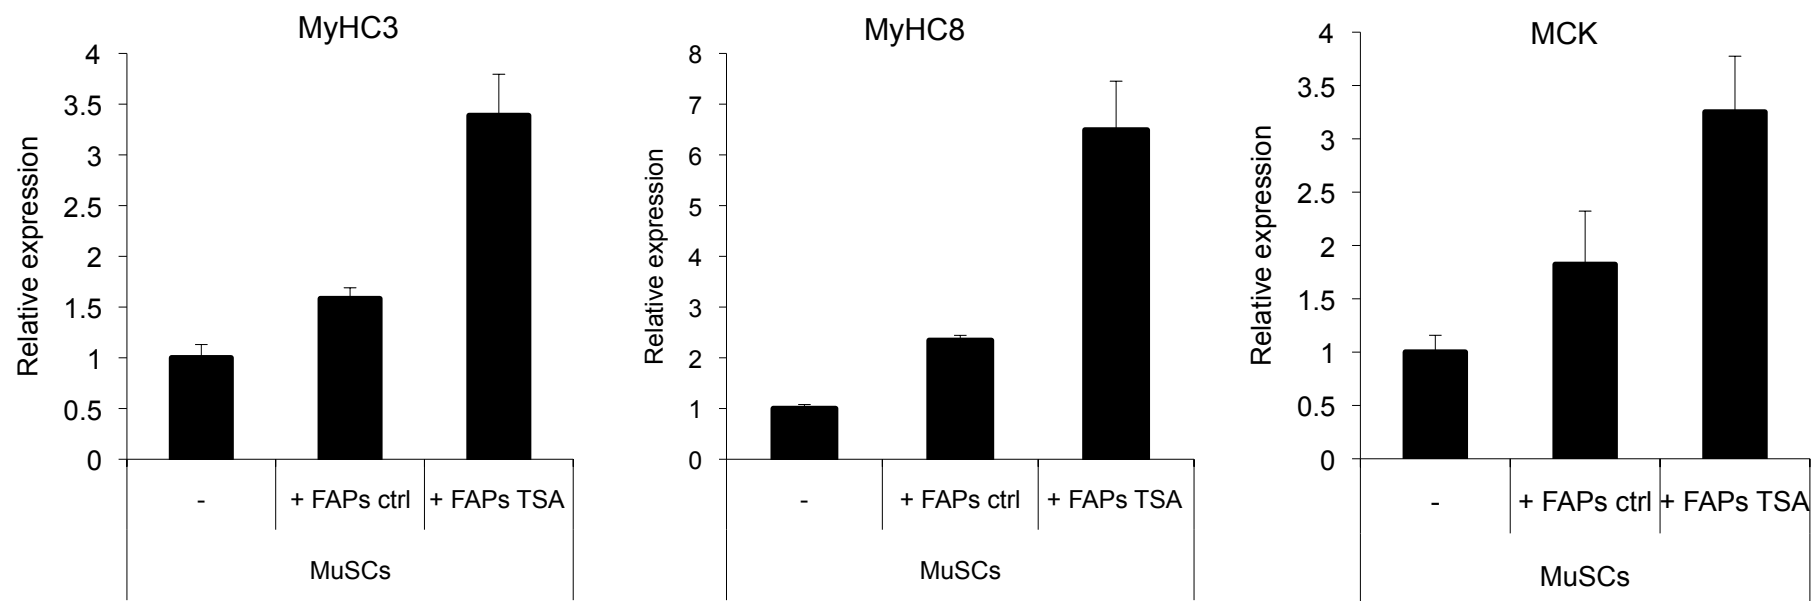

**Supportive information Figure 4 – HDACi-treated FAPs promote expression of muscle differentiation markers in co-cultured MuSCs.**

FACS-isolated MuSCs from young MDX mice were co-cultured in transwell with FAPs isolated from young MDX mice (ctrl or TSA treated for 15 days). After 7 days of transwell co-culture the myogenic differentiation of MuSCs was assessed by qRT-PCR analyzing RNA levels of MyHC3, MyHC8 and MCK.
